# Supplementary material for: Heterovalent tin ion-regulated bromobismuth double perovskite-based fully-inorganic solar cells
Source: Royal Society of Chemistry journal article supplement (doi:10.1039/d3tc02750c), 2023-01-01
Supplement: d3tc02750c1.pdf [file d3tc02750c1.pdf]

## Supplementary Information

# Heterovalent Tin Ion-Regulated Bromobismuth Double Perovskite-Based Fully-Inorganic Solar Cell

Anurag Dehingia<sup>a</sup>, Ujjal Das<sup>b</sup> and Asim Roy<sup>a,\*</sup>

<sup>a</sup>*Department of Physics, National Institute of Technology Silchar, Silchar-788010, Assam, India*

<sup>b</sup>*Institute of Nano Science and Technology, Mohali-140306, Punjab, India*

\*Corresponding author: 28.asim@gmail.com; asim@phy.nits.ac.in

This file includes Figures S1-S5 and Tables S1-S2

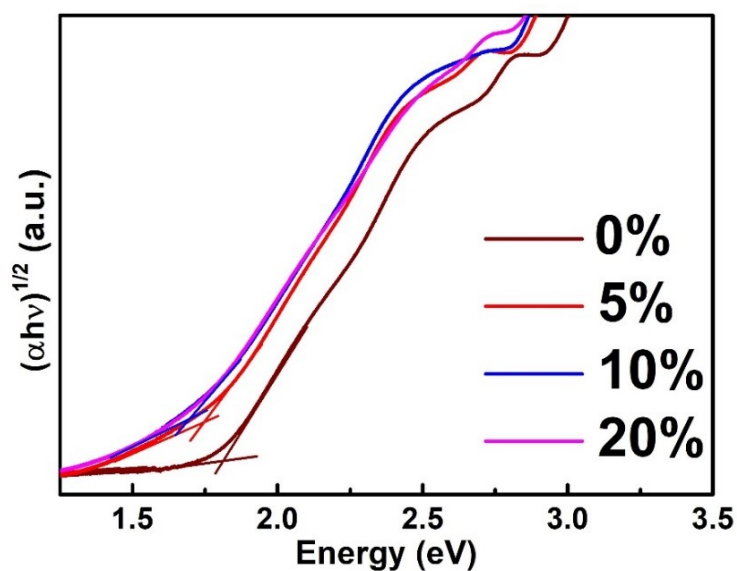

**Figure S1.** Tauc's plot of the perovskite films.

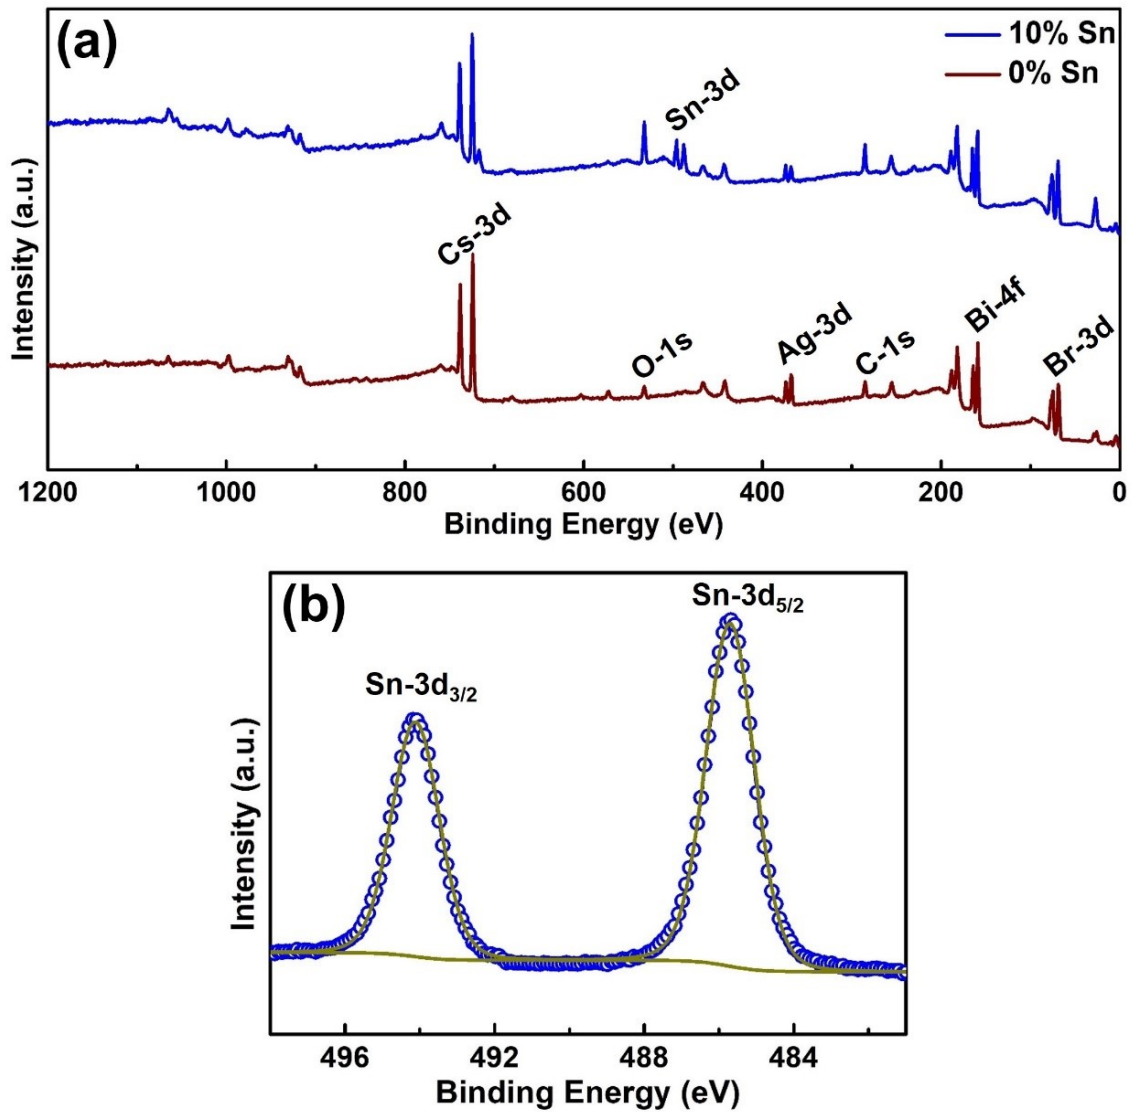

**Figure S2.** (a) XPS survey spectra of pristine and Sn-doped  $\text{Cs}_2\text{AgBiBr}_6$  films, (b) high-resolution Sn-3d peaks.

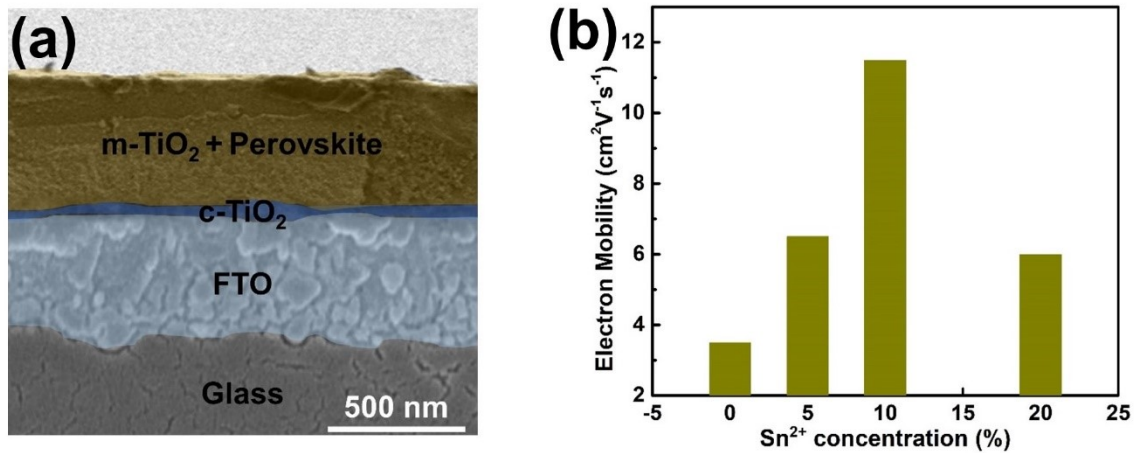

**Figure S3.** (a) Cross-sectional image of the FTO/c-TiO<sub>2</sub>/mTiO<sub>2</sub>+perovskite film, (b) electron mobility of the perovskite films with different Sn-concentration.

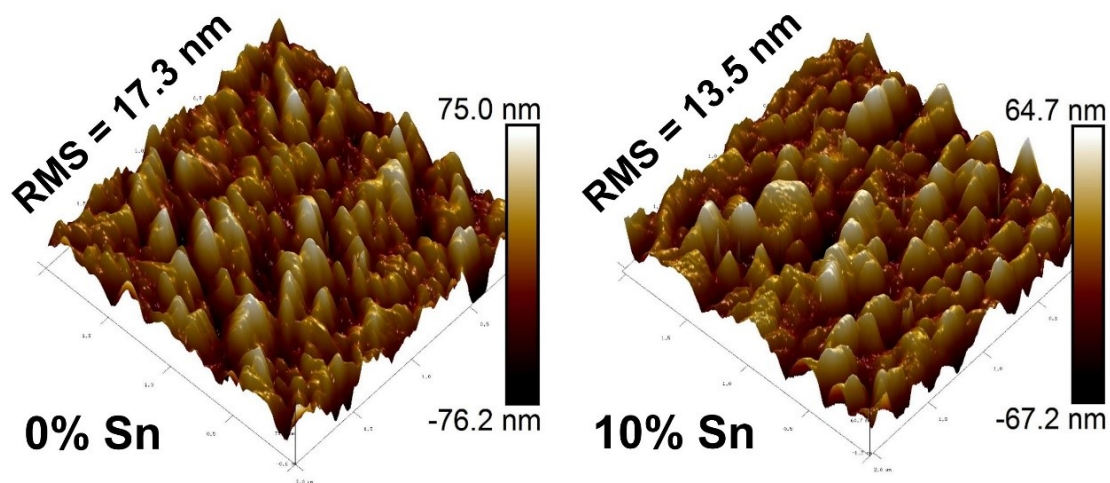

**Figure S4.** 3-D AFM images of the perovskite films with and without Sn.

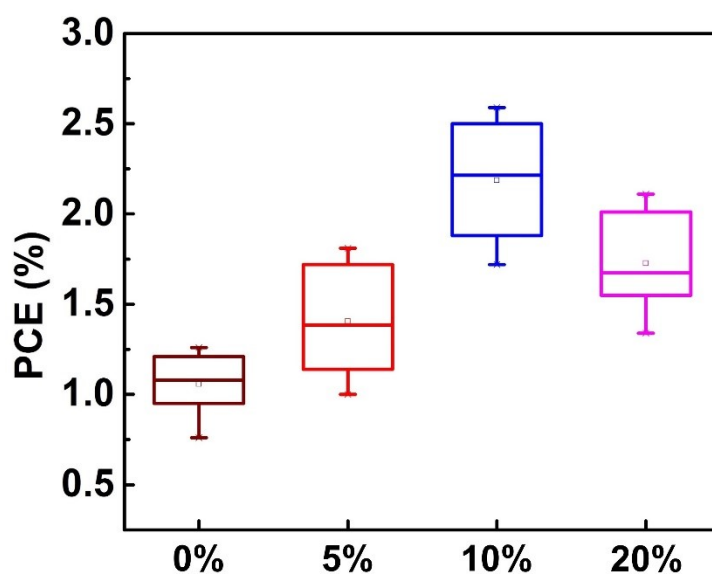

**Figure S5.** Statistical distribution of PCE.

**Table S1.** Photovoltaic parameters of the champion cell in different scan directions.

| Device        | Scan Direction | $V_{oc}$ (volt) | $J_{sc}$ ( $\text{mA}/\text{cm}^2$ ) | FF   | PCE (%) |
|---------------|----------------|-----------------|--------------------------------------|------|---------|
| Champion Cell | Forward        | 1.02            | 3.42                                 | 0.70 | 2.44    |
|               | Reverse        | 1.02            | 3.63                                 | 0.74 | 2.74    |

**Table S2.** Comparison of photovoltaic performance with reported DP-based solar cells.

| Year | Device                                                                                    | $V_{oc}$ (volt) | $J_{sc}$ ( $\text{mA}/\text{cm}^2$ ) | FF   | PCE (%) | Ref |
|------|-------------------------------------------------------------------------------------------|-----------------|--------------------------------------|------|---------|-----|
| 2017 | FTO/c-TiO <sub>2</sub> /m-TiO <sub>2</sub> /Cs <sub>2</sub> AgBiBr <sub>6</sub> /Spiro/Au | 0.98            | 3.93                                 | 0.63 | 2.43    | [1] |
| 2018 | ITO/TiO <sub>2</sub> /Cs <sub>2</sub> AgBiBr <sub>6</sub> /Spiro/Au                       | 1.06            | 1.55                                 | 0.74 | 1.22    | [2] |
| 2018 | FTO/TiO <sub>2</sub> /Cs <sub>2</sub> AgBiBr <sub>6</sub> /PTAA/Au                        | 1.02            | 2.84                                 | 0.67 | 1.26    | [3] |
| 2018 | ITO/Cu-NiO/Cs <sub>2</sub> AgBiBr <sub>6</sub> /C <sub>60</sub> /BCP/Ag                   | 1.01            | 3.19                                 | 0.69 | 2.23    | [4] |

|             |                                                                                                                                      |             |             |             |             |                  |
|-------------|--------------------------------------------------------------------------------------------------------------------------------------|-------------|-------------|-------------|-------------|------------------|
| 2019        | ITO/SnO <sub>2</sub> /Cs <sub>2</sub> AgBiBr <sub>6</sub> /Spiro/Au                                                                  | 1.01        | 1.73        | 0.69        | 1.21        | [5]              |
| 2019        | ITO/TiO <sub>2</sub> /Cs <sub>2</sub> AgBiBr <sub>6</sub> /Spiro/MoO <sub>3</sub> /Ag                                                | 1.01        | 3.82        | 0.65        | 2.51        | [6]              |
| 2020        | FTO/TiO <sub>2</sub> /Cs <sub>2</sub> AgBiBr <sub>6</sub> /P3HT/Cu                                                                   | 1.07        | 2.58        | 0.69        | 1.91        | [7]              |
| 2020        | ITO/SnO <sub>2</sub> /Cs <sub>2</sub> AgBiBr <sub>6</sub> /Zn-Chl/Ag                                                                 | 0.99        | 3.83        | 0.73        | 2.79        | [8]              |
| 2020        | FTO/c-TiO <sub>2</sub> /m-TiO <sub>2</sub> /Cs <sub>2</sub> AgBiBr <sub>6</sub> /N719/Spiro/Ag                                       | 1.06        | 5.13        | 0.52        | 2.84        | [9]              |
| 2020        | FTO/c-TiO <sub>2</sub> /m-TiO <sub>2</sub> /(Cs <sub>1-x</sub> Li <sub>x</sub> ) <sub>2</sub> AgBiBr <sub>6</sub> /Carbon            | 1.18        | 3.15        | 0.69        | 2.57        | [10]             |
| 2021        | FTO/c-TiO <sub>2</sub> /m-TiO <sub>2</sub> /Cs <sub>2</sub> AgBiBr <sub>6</sub> /PMMA/Carbon                                         | 1.18        | 2.82        | 0.67        | 2.25        | [11]             |
| 2021        | FTO/Ti <sub>3</sub> C <sub>2</sub> T <sub>x</sub> -TiO <sub>2</sub> /Cs <sub>2</sub> AgBiBr <sub>6</sub> /Spiro/MoO <sub>3</sub> /Au | 0.96        | 4.14        | 0.70        | 2.81        | [12]             |
| 2021        | ITO/TiO <sub>2</sub> -D149/Cs <sub>2</sub> AgBiBr <sub>6</sub> /Spiro/Ag                                                             | 0.73        | 8.24        | 0.70        | 4.23        | [13]             |
| 2022        | FTO/TiO <sub>2</sub> /Cs <sub>2</sub> AgBiBr <sub>6</sub> /SnS/Carbon                                                                | 1.02        | 3.74        | 0.51        | 1.95        | [14]             |
| 2022        | FTO/TiO <sub>2</sub> /BMPyr-Cs <sub>2</sub> AgBiBr <sub>6</sub> /Carbon                                                              | 1.20        | 2.61        | 0.71        | 2.22        | [15]             |
| 2022        | FTO/TiO <sub>2</sub> /Cs <sub>2</sub> AgBiBr <sub>6</sub> /MoS <sub>2</sub> /Carbon                                                  | 1.10        | 6.12        | 0.62        | 4.17        | [16]             |
| 2022        | FTO/SnO <sub>2</sub> /Hydrogenated-Cs <sub>2</sub> AgBiBr <sub>6</sub> /Spiro/Au                                                     | 0.92        | 11.40       | 0.61        | 6.37        | [17]             |
| <b>2023</b> | <b>FTO/c-TiO<sub>2</sub>/m-TiO<sub>2</sub>/Cs<sub>2</sub>Ag<sub>1-x</sub>Sn<sub>x</sub>BiBr<sub>6</sub>/CuSCN/Au</b>                 | <b>1.02</b> | <b>3.63</b> | <b>0.74</b> | <b>2.74</b> | <b>This work</b> |

- [1] E. Greul, M.L. Petrus, A. Binek, P. Docampo, T. Bein, Highly stable, phase pure Cs<sub>2</sub>AgBiBr<sub>6</sub> double perovskite thin films for optoelectronic applications, *Journal of Materials Chemistry A* 5(37) (2017) 19972-19981.
- [2] W. Ning, F. Wang, B. Wu, J. Lu, Z. Yan, X. Liu, Y. Tao, J.M. Liu, W. Huang, M. Fahlman, Long electron-hole diffusion length in high-quality lead-free double perovskite films, *Advanced Materials* 30(20) (2018) 1706246.
- [3] M. á Pantaler, K.T. á Cho, V.I.E. á Queloz, I. á Garc'Ya Benito, C. á Fettkenhauer, I. á Anusca, MK á Nazeeruddin, DC á Lupascu, G. áGrancini, *ACS Energy Lett* 3 (2018) 1781.
- [4] W. Gao, C. Ran, J. Xi, B. Jiao, W. Zhang, M. Wu, X. Hou, Z. Wu, High-quality Cs<sub>2</sub>AgBiBr<sub>6</sub> double perovskite film for lead-free inverted planar heterojunction solar cells with 2.2% efficiency, *ChemPhysChem* 19(14) (2018) 1696-1700.
- [5] Z. Zhang, C. Wu, D. Wang, G. Liu, Q. Zhang, W. Luo, X. Qi, X. Guo, Y. Zhang, Y. Lao, Improvement of Cs<sub>2</sub>AgBiBr<sub>6</sub> double perovskite solar cell by rubidium doping, *Organic Electronics* 74 (2019) 204-210.
- [6] F. Igbari, R. Wang, Z.-K. Wang, X.-J. Ma, Q. Wang, K.-L. Wang, Y. Zhang, L.-S. Liao, Y. Yang, Composition stoichiometry of Cs<sub>2</sub>AgBiBr<sub>6</sub> films for highly efficient lead-free perovskite solar cells, *Nano letters* 19(3) (2019) 2066-2073.
- [7] M. Ghasemi, L. Zhang, J.H. Yun, M. Hao, D. He, P. Chen, Y. Bai, T. Lin, M. Xiao, A. Du, Dual-ion-diffusion induced degradation in lead-free Cs<sub>2</sub>AgBiBr<sub>6</sub> double perovskite solar cells, *Advanced Functional Materials* 30(42) (2020) 2002342.
- [8] B. Wang, L. Yang, C. Dall'Agnesse, A.K. Jena, S.-i. Sasaki, T. Miyasaka, H. Tamiaki, X.-F. Wang, Photoactive Zn-chlorophyll hole transporter-sensitized lead-free Cs<sub>2</sub>AgBiBr<sub>6</sub> perovskite solar cells, *Solar RRL* 4(7) (2020) 2000166.
- [9] X. Yang, Y. Chen, P. Liu, H. Xiang, W. Wang, R. Ran, W. Zhou, Z. Shao, Simultaneous power conversion efficiency and stability enhancement of Cs<sub>2</sub>AgBiBr<sub>6</sub> lead-free inorganic perovskite solar cell through adopting a multifunctional dye interlayer, *Advanced Functional Materials* 30(23) (2020) 2001557.
- [10] J. Li, J. Duan, J. Du, X. Yang, Y. Wang, P. Yang, Y. Duan, Q. Tang, Alkali metal ion-regulated lead-free, all-inorganic double perovskites for HTM-free, carbon-based solar cells, *ACS Applied Materials & Interfaces* 12(42) (2020) 47408-47415.
- [11] J. Li, F. Yan, P. Yang, Y. Duan, J. Duan, Q. Tang, Suppressing Interfacial Shunt Loss via Functional Polymer for Performance Improvement of Lead-Free Cs<sub>2</sub>AgBiBr<sub>6</sub> Double Perovskite Solar Cells, *Solar RRL* 6(4) (2022) 2100791.
- [12] Z. Li, P. Wang, C. Ma, F. Igbari, Y. Kang, K.-L. Wang, W. Song, C. Dong, Y. Li, J. Yao, D. Meng, Z.-K. Wang, Y. Yang, Single-Layered MXene Nanosheets Doping TiO<sub>2</sub> for Efficient and Stable Double Perovskite Solar Cells, *Journal of the American Chemical Society* 143(6) (2021) 2593-2600.
- [13] B. Wang, N. Li, L. Yang, C. Dall'Agnesse, A.K. Jena, T. Miyasaka, X.-F. Wang, Organic dye/Cs<sub>2</sub>AgBiBr<sub>6</sub> double perovskite heterojunction solar cells, *Journal of the American Chemical Society* 143(36) (2021) 14877-14883.
- [14] Y. Ou, J. Lu, X. Zhong, X. Li, S. Wu, P. Chen, L. Zhou, Efficiency improvement of Cs<sub>2</sub>AgBiBr<sub>6</sub> perovskite solar cells with modification of SnS quantum dots, *Materials Letters* 312 (2022) 131672.
- [15] J. Li, X. Meng, Z. Wu, Y. Duan, R. Guo, W. Xiao, Y. Zhang, Y. Li, Y. Shen, W. Zhang, Pinning bromide ion with ionic liquid in lead-free Cs<sub>2</sub>AgBiBr<sub>6</sub> double perovskite solar cells, *Advanced Functional Materials* 32(25) (2022) 2112991.
- [16] B. Pang, X. Chen, F. Bao, Y. Liu, T. Feng, H. Dong, L. Yu, L. Dong, Improved charge extraction and atmospheric stability of all-inorganic Cs<sub>2</sub>AgBiBr<sub>6</sub> perovskite solar cells by MoS<sub>2</sub> nanoflakes, *Solar Energy Materials and Solar Cells* 246 (2022) 111932.
- [17] Z. Zhang, Q. Sun, Y. Lu, F. Lu, X. Mu, S.-H. Wei, M. Sui, Hydrogenated Cs<sub>2</sub>AgBiBr<sub>6</sub> for significantly improved efficiency of lead-free inorganic double perovskite solar cell, *Nature communications* 13(1) (2022) 3397.

## References:
